# Supplementary material for: Structure–Antioxidant–Antiproliferative Activity Relationships of Natural C7 and C7–C8 Hydroxylated Flavones and Flavanones
Source: PubMed Central journal article supplement (PMC6680932; doi:10.3390/antiox8070210), 2019-07-07
Supplement: antioxidants-08-00210-s001.pdf [file antioxidants-08-00210-s001.pdf]

# Supplementary Materials:

Structure - antioxidant - antiproliferative activity relationships of natural C7 and C7-C8 hydroxylated flavones and flavanones

Sandra Sordon<sup>a\*</sup>, Jarosław Popłoński<sup>a</sup>, Magdalena Milczarek<sup>b</sup>, Martyna Stachowicz<sup>b</sup>, Tomasz Tronina<sup>a</sup>, Alicja Z. Kucharska<sup>c</sup>, Joanna Wietrzyk<sup>b</sup>, Ewa Huszcza<sup>a</sup>.

a Department of Chemistry, Wrocław University of Environmental and Life Sciences, Norwida 25, 50-375 Wrocław, Poland

b Hirszfeld Institute of Immunology and Experimental Therapy, Polish Academy of Sciences, Weigla 12, 53-114 Wrocław, Poland

c Department of Fruit, Vegetable and Plant Nutraceutical Technology, Wrocław University of Environmental and Life Sciences, Chełmońskiego 37, 51-630 Wrocław, Poland

\*Correspondence: sandra.sordon@upwr.edu.pl

## List of contents:

1. NMR spectra of 8-hydroxydiosmetin (**12**).  
Figure S1: <sup>1</sup>H-NMR (600 MHz, DMSO-*d*<sub>6</sub>) spectrum.  
Figure S2: <sup>13</sup>C-NMR (150 MHz, DMSO-*d*<sub>6</sub>) spectrum.
2. NMR spectra of 8-hydroxypinocembrin (**13**).  
Figure S3: <sup>1</sup>H-NMR (600 MHz, DMSO-*d*<sub>6</sub>) spectrum.  
Figure S4: <sup>13</sup>C-NMR (150 MHz, DMSO-*d*<sub>6</sub>) spectrum.
3. NMR spectra of the mixture of 8-hydroxyeriodictyol and 6-hydroxyeriodictyol (**16**, **17**).  
Figure S5: <sup>1</sup>H-NMR (600 MHz, DMSO-*d*<sub>6</sub>) spectrum.  
Figure S6: <sup>13</sup>C-NMR (150 MHz, DMSO-*d*<sub>6</sub>) spectrum.
4. Table S1: antioxidant activity of tested flavonoids (**1-18**) determined in separate tests: ABTS, DPPH and FRAP.

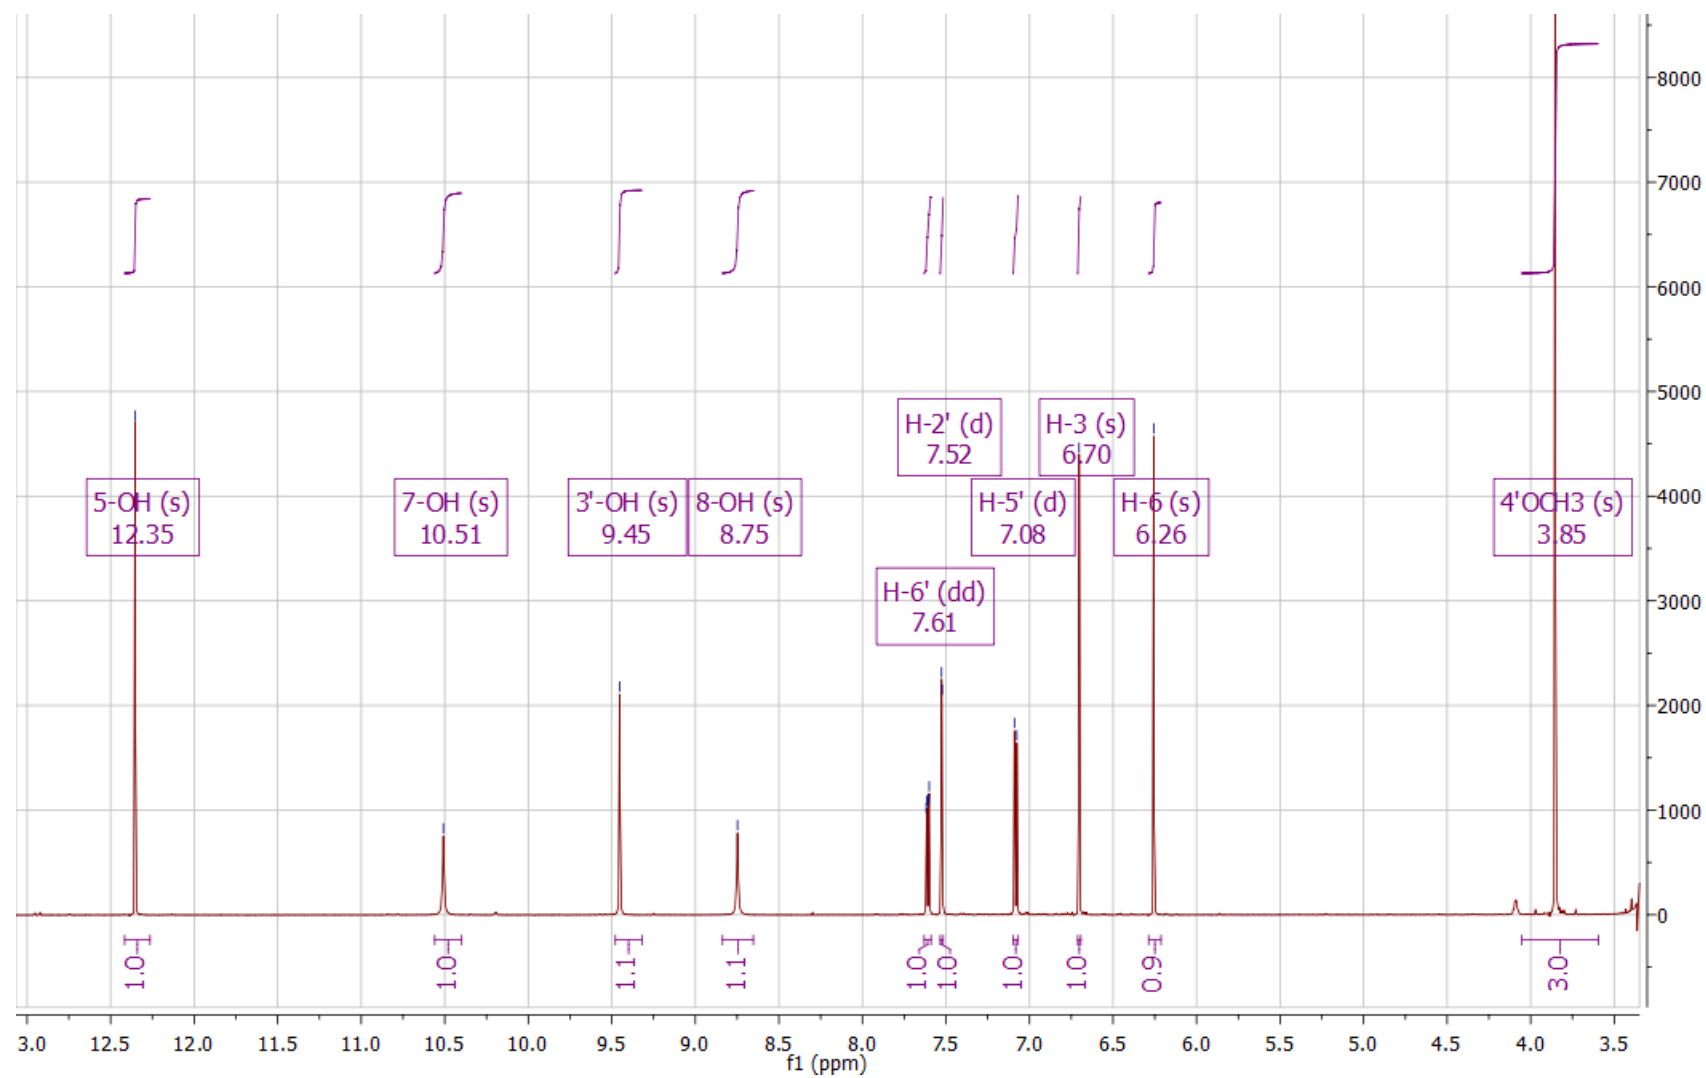

Figure S1. <sup>1</sup>H-NMR (600 MHz, DMSO-*d*<sub>6</sub>) spectrum of 8-hydroxydiosmetin (**12**).

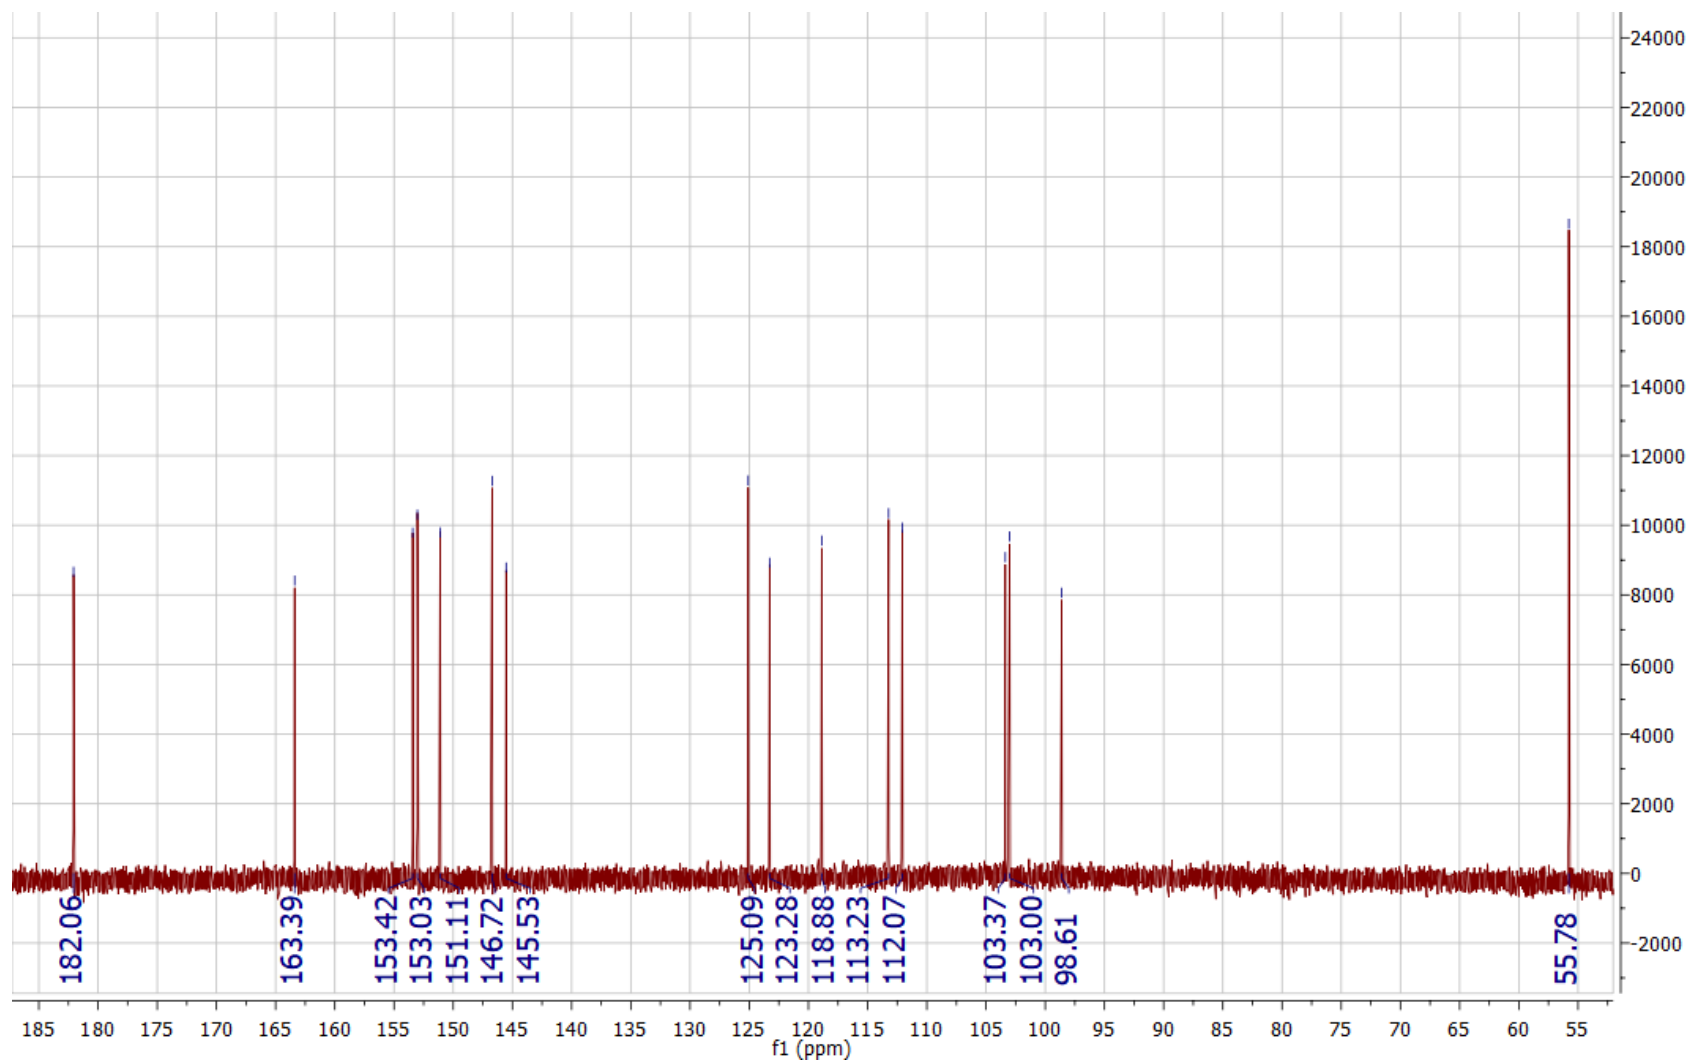

Figure S2.  $^{13}\text{C}$ -NMR (150 MHz,  $\text{DMSO-}d_6$ ) spectrum of 8-hydroxydiosmetin (**12**).

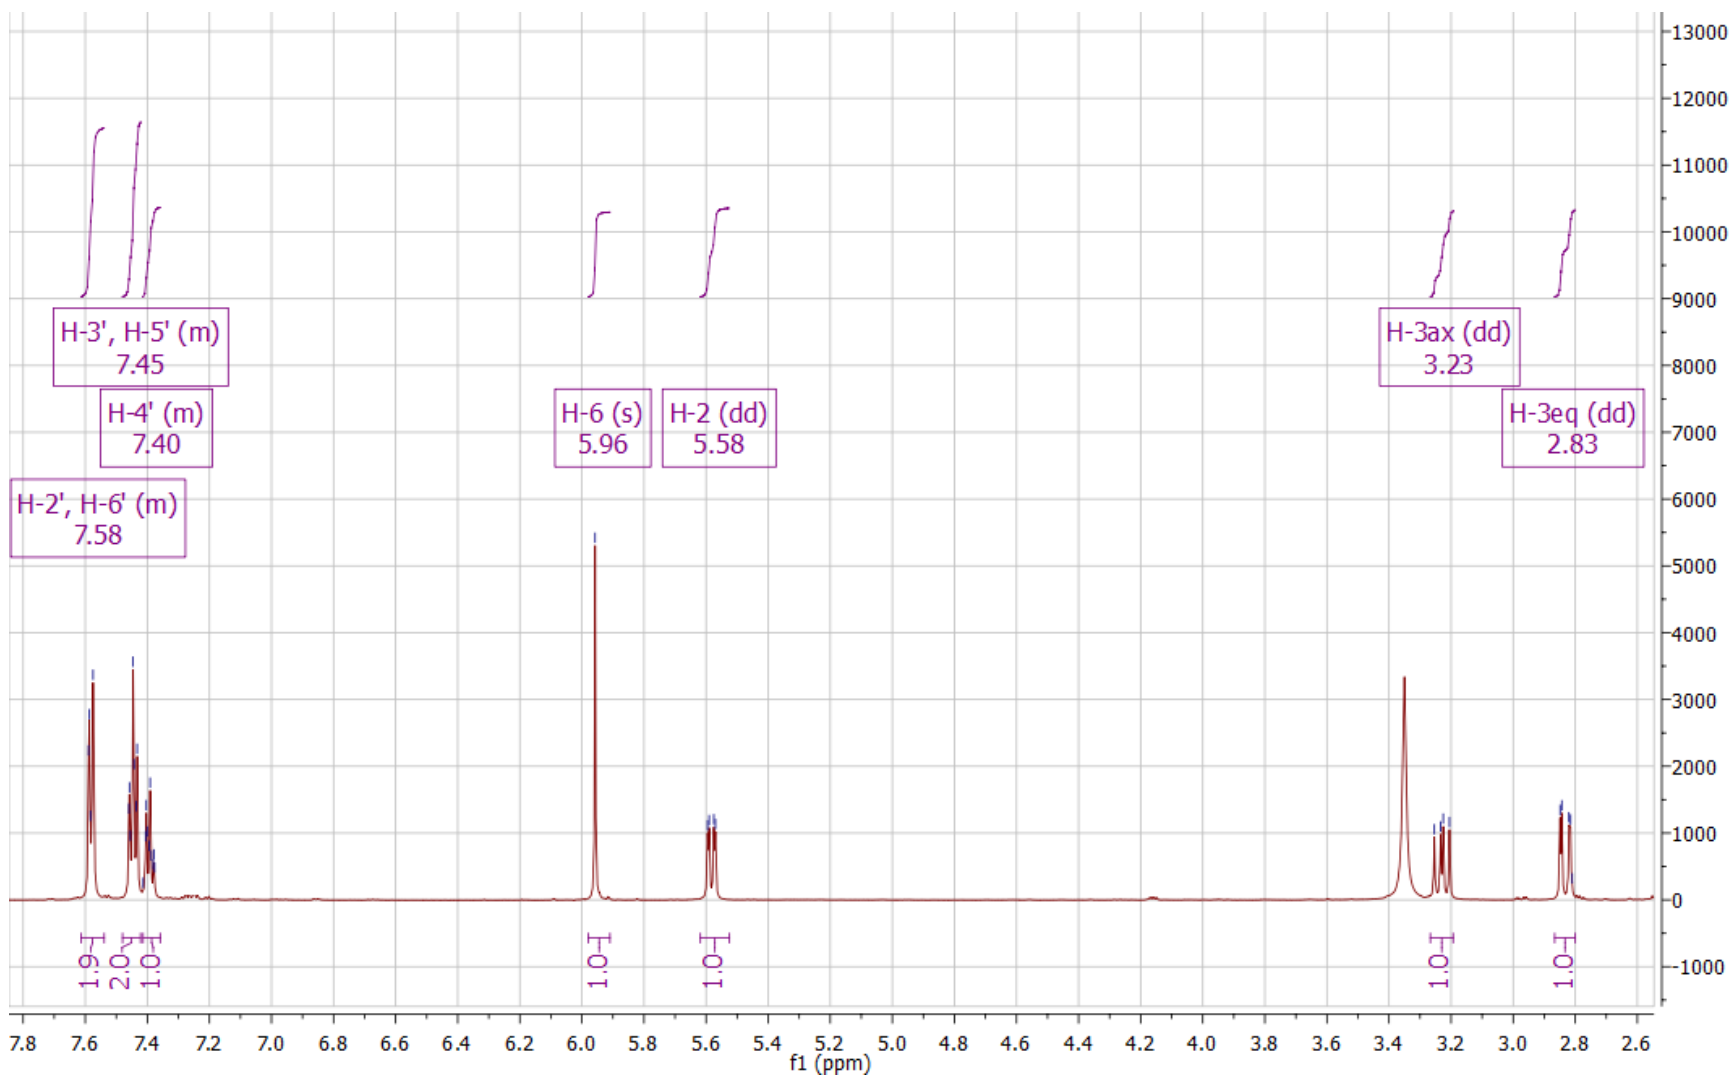

Figure S3. <sup>1</sup>H-NMR (600 MHz, DMSO-*d*<sub>6</sub>) spectrum of 8-hydroxy-pinocembrin (**13**).

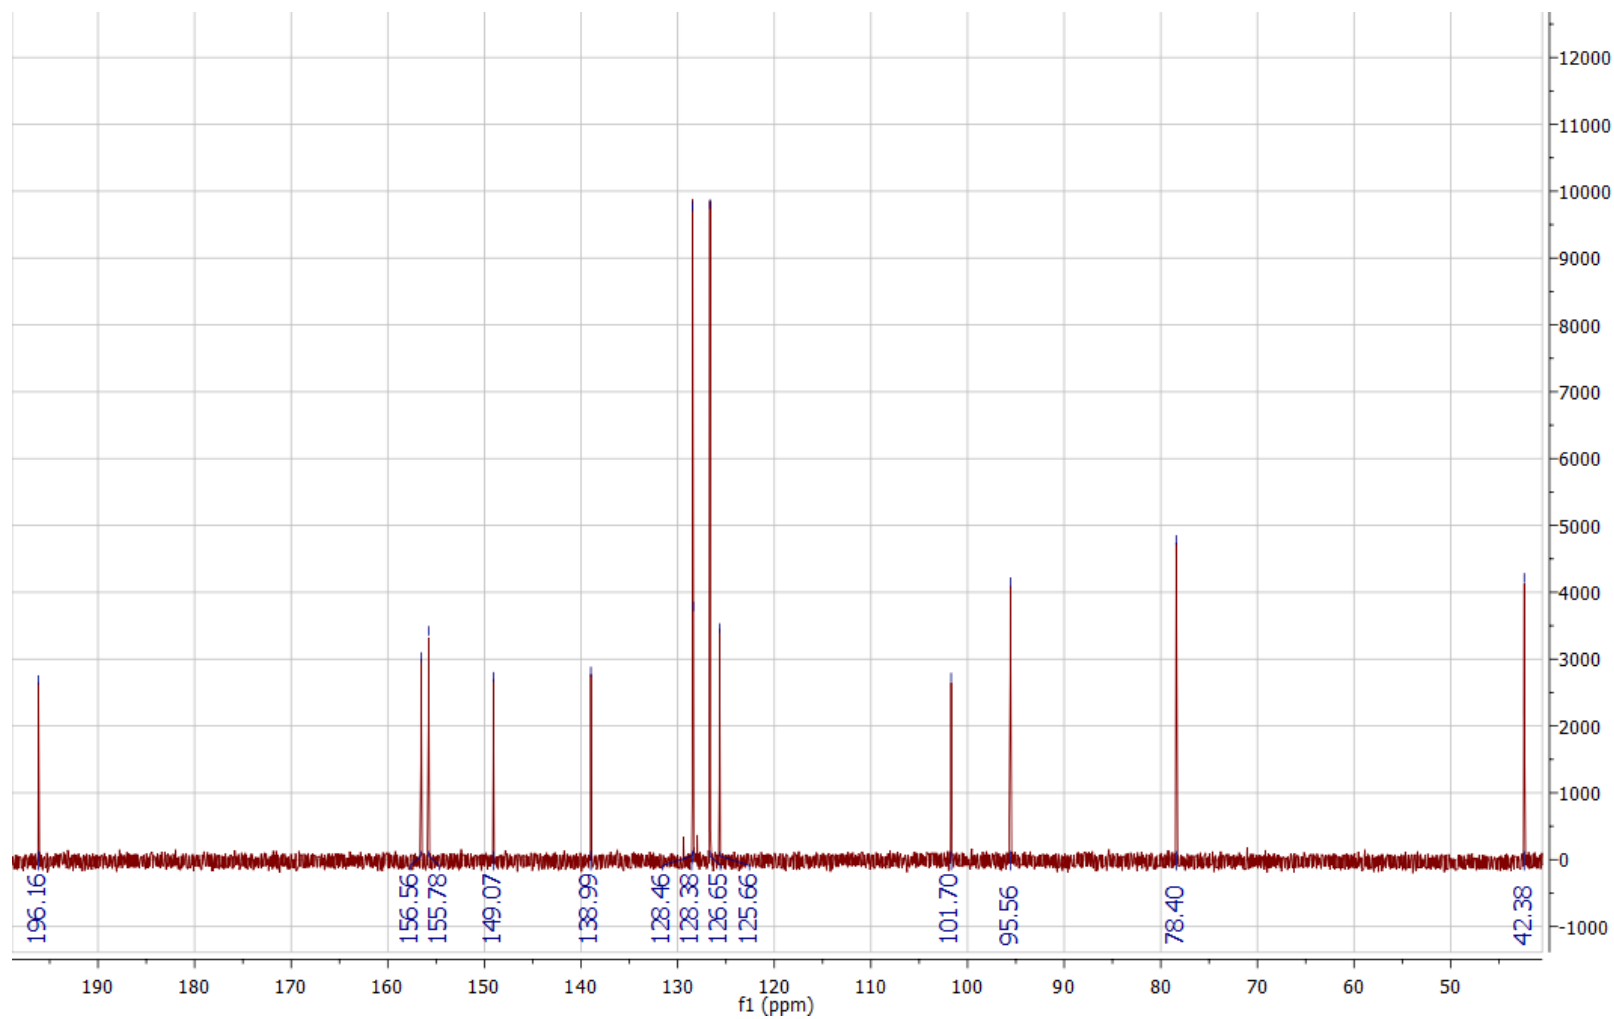

Figure S4.  $^{13}\text{C}$ -NMR (150 MHz,  $\text{DMSO-}d_6$ ) spectrum of 8-hydroxy-pinocembrin (**13**).

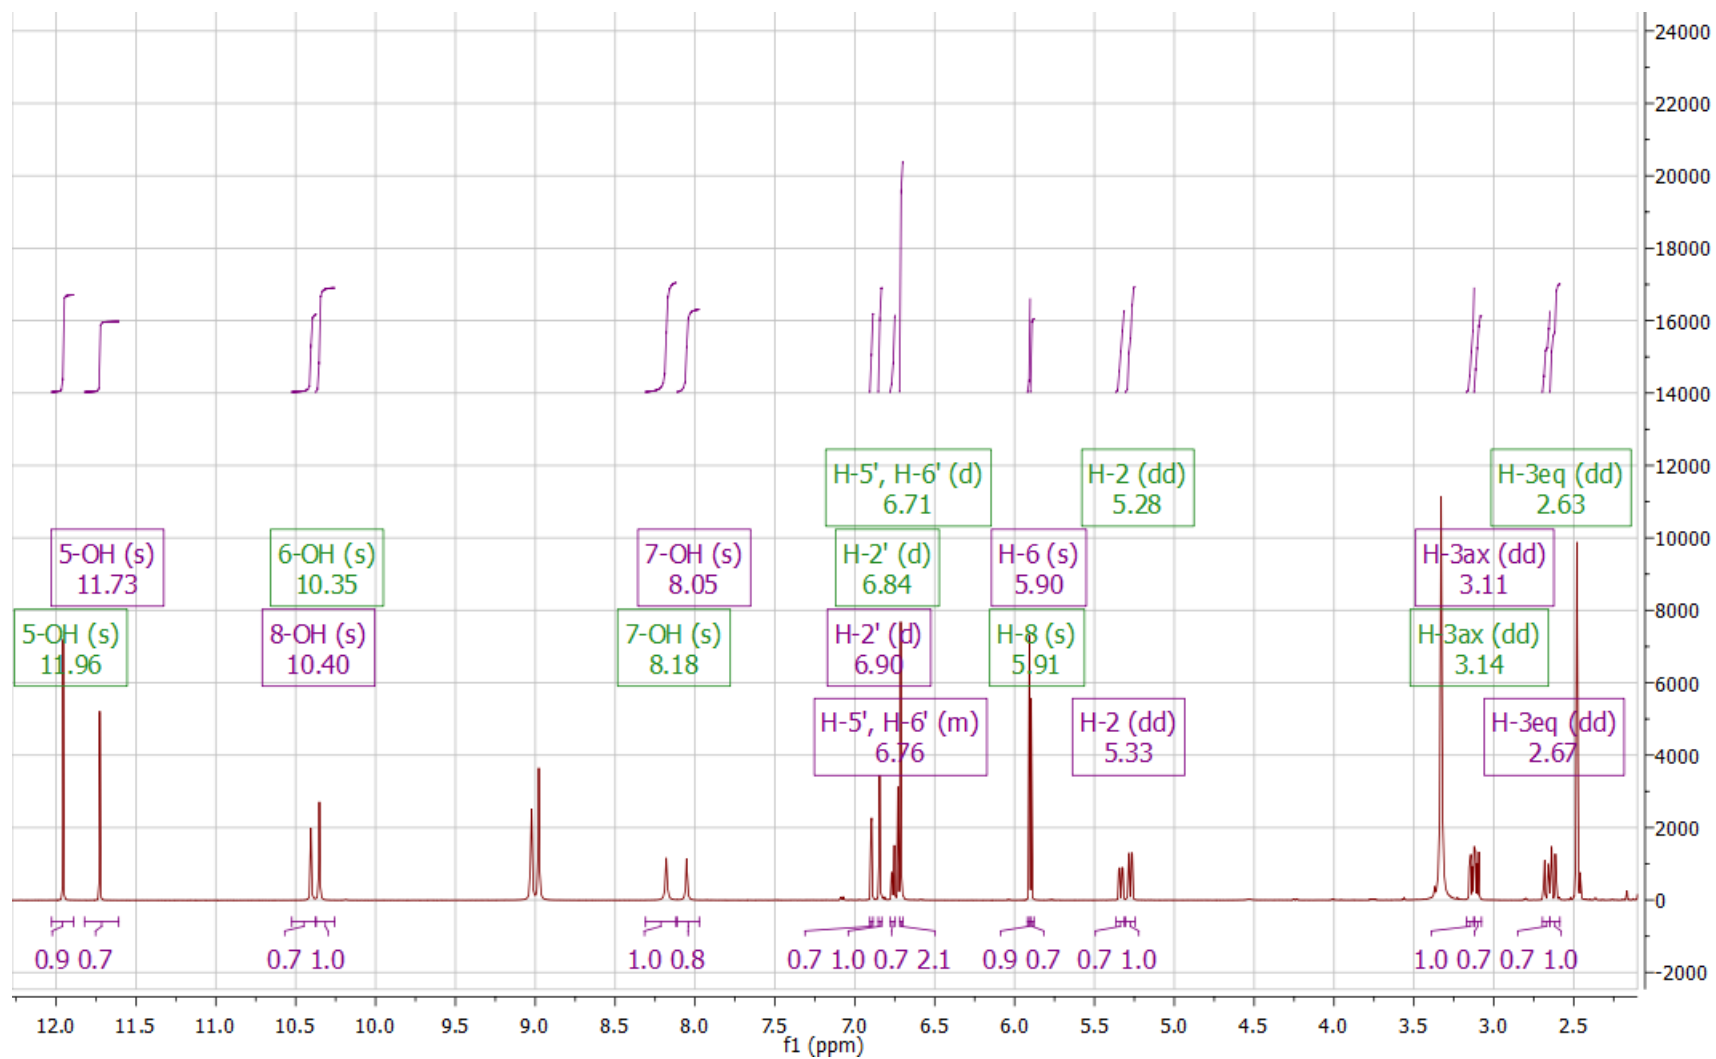

Figure S5. <sup>1</sup>H-NMR (600 MHz, DMSO-*d*<sub>6</sub>) spectrum of 8-hydroxyeriodictyol (**16**) (violet) and 6-hydroxyeriodictyol (**17**) (green).

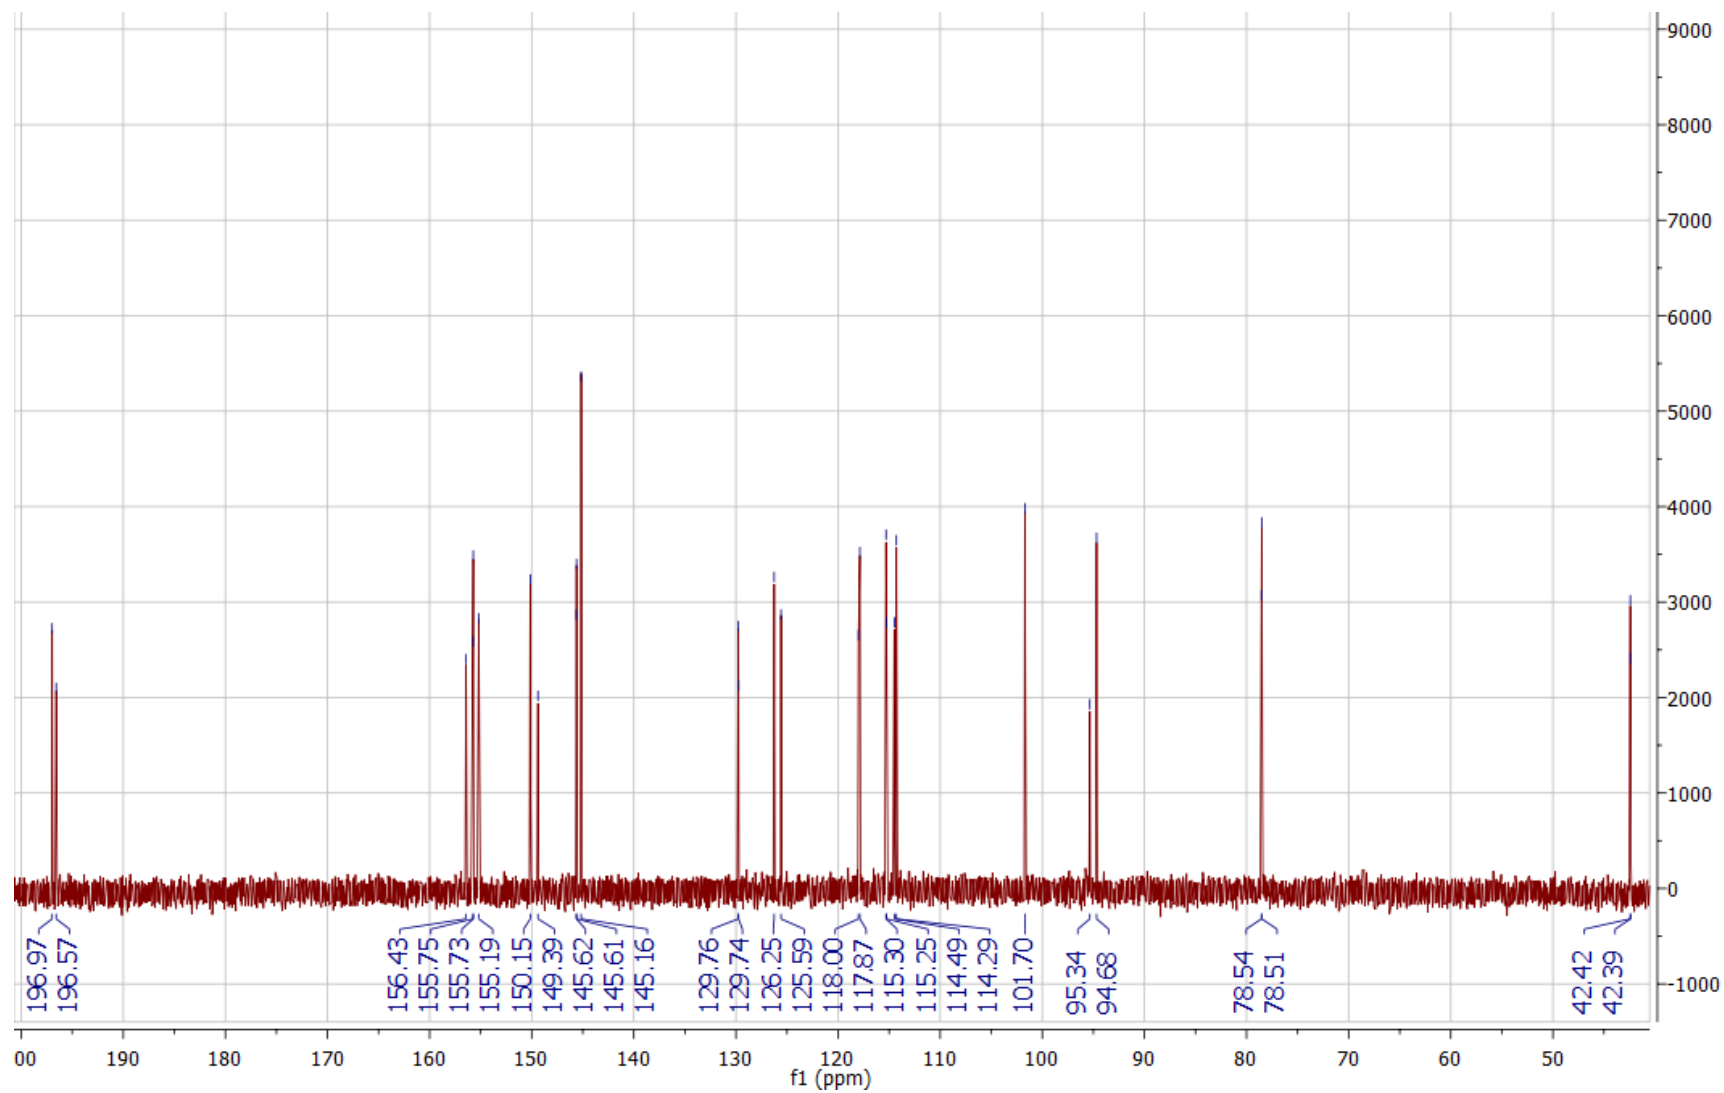

Figure S6.  $^{13}\text{C}$ -NMR (150 MHz,  $\text{DMSO-}d_6$ ) spectrum of 8-hydroxyperiodictyol and 6-hydroxyperiodictyol (**16**, **17**).

Table S1. Antioxidant activity of tested flavonoids.<sup>a</sup>

| Compound           | TEAC <sub>ABTS</sub> | TEAC <sub>DPPH</sub> | TEAC <sub>FRAP</sub> |
|--------------------|----------------------|----------------------|----------------------|
| <b>1</b>           | 0.084 ± 0.011        | 0.004 ± 0.001        | ND                   |
| <b>2</b>           | 0.250 ± 0.014        | 0.005 ± 0.002        | ND                   |
| <b>3</b>           | 16.645 ± 0.897       | 10.50 ± 0.117        | 17.686 ± 0.327       |
| <b>4</b>           | 1.712 ± 0.041        | 0.008 ± 0.001        | ND                   |
| <b>5</b>           | 0.165 ± 0.009        | 0.005 ± 0.001        | ND                   |
| <b>6</b>           | 0.347 ± 0.020        | 0.017 ± 0.002        | ND                   |
| <b>7</b>           | 13.988 ± 0.251       | 9.582 ± 0.315        | 10.619 ± 0.319       |
| <b>8</b>           | 13.254 ± 0.123       | 0.098 ± 0.002        | 4.025 ± 0.175        |
| <b>9</b>           | 14.173 ± 1.591       | 8.038 ± 0.061        | 8.900 ± 0.582        |
| <b>10</b>          | 10.184 ± 1.768       | 5.560 ± 0.121        | 7.824 ± 0.657        |
| <b>11</b>          | 34.450 ± 1.016       | 13.208 ± 0.080       | 36.895 ± 0.432       |
| <b>12</b>          | 13.405 ± 0.826       | 8.496 ± 0.040        | 11.340 ± 0.203       |
| <b>13</b>          | 20.763 ± 0.939       | 9.164 ± 0.097        | 12.861 ± 0.313       |
| <b>14 and 15*</b>  | 17.370 ± 0.989       | 9.098 ± 0.045        | 8.686 ± 0.093        |
| <b>16 and 17**</b> | 29.243 ± 1.362       | 14.649 ± 0.182       | 22.367 ± 1.801       |
| <b>18</b>          | 31.187 ± 1.353       | 14.150 ± 0.229       | 25.260 ± 0.909       |

<sup>a</sup> Results are expressed as the equivalent of  $\mu\text{mol}$  trolox (TEAC<sub>ABTS</sub>, TEAC<sub>DPPH</sub>, TEAC<sub>FRAP</sub>) per  $\mu\text{mol}$  of tested compound; SD – standard deviation; ND – not determined in the range of concentrations tested (50  $\mu\text{g}/\text{mL}$  - 10  $\text{mg}/\text{mL}$ ); \*ratio 19:1 (by HPLC); \*\*ratio 1:1.3 (by HPLC).
